# Supplementary material for: Development and Evaluation of Liquid Plaster Loaded with Chromolaena odorata Leaf Extract Endowed with Several Beneficial Properties to Wound Healing
Source: MDPI journal article supplement (doi:10.3390/gels8020072), 2022-01-24
Supplement: s1 [file s1]

# Supplementary Materials

## Antera Report

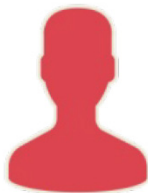

First name 0  
Last name 30

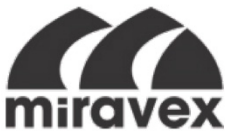

Miravex Limited features Antera 3D, the cutting edge device for digital skin analysis.

### New Image

#### Redness

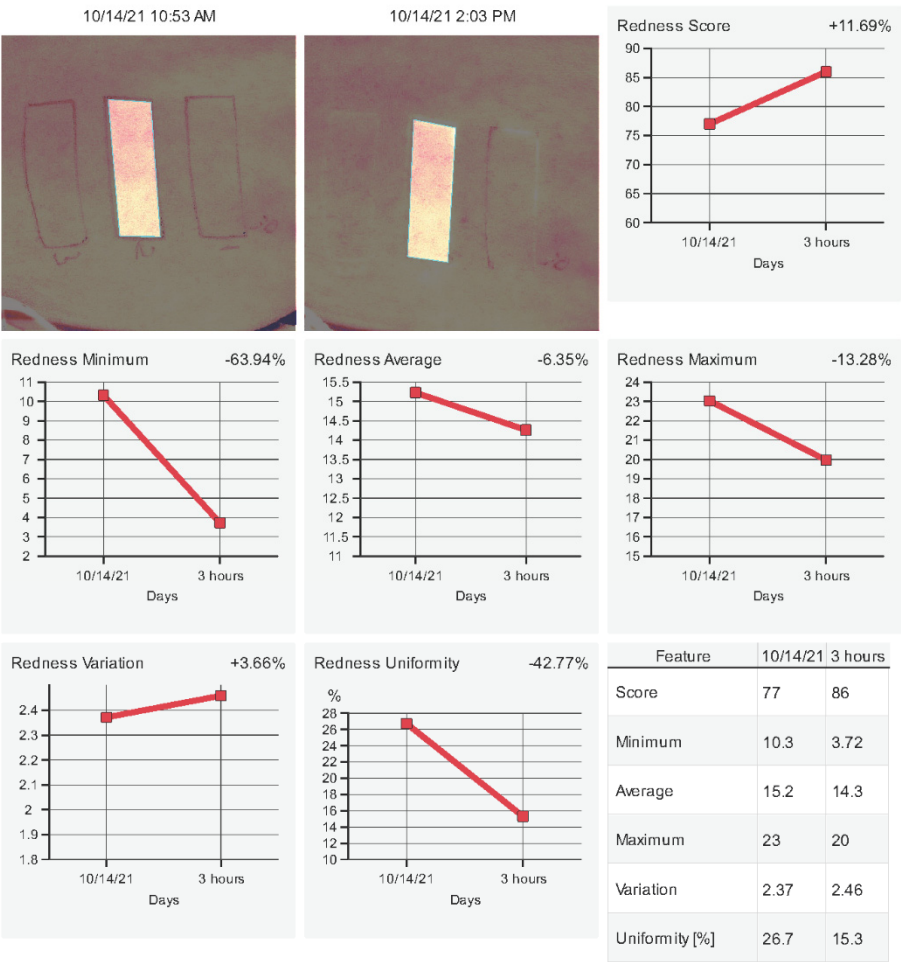

Figure S1. Example images and redness score results obtained from the Antera 3D.
